# Supplementary material
Source: publisher site journal article supplement (https://www.dovepress.com/article/371446)
Supplement: Supplementary file 1 [file get_supplementary_file.php]

**Supplementary materials**

Table S1 The *r* of correlation analysis between parameters

|  | Urine epithelium | IgG | IgA | IgM | C3 | C4 | PT | APTT | TT | Fib | D-D | WBC | Lym | Mon | Neu | Eos |
| --- | --- | --- | --- | --- | --- | --- | --- | --- | --- | --- | --- | --- | --- | --- | --- | --- |
| C-TRUST | -0.167 | 0.057 | -0.029 | -0.016 | 0.094 | 0.164 | 0.187 | -0.129 | -0.203 | 0.160 | 0.274 | -0.098 | 0.003 | -0.080 | 0.057 | 0.017 |
| C-CL | -0.393 | 0.171 | 0.164 | 0.168 | 0.138 | 0.048 | -0.146 | 0.054 | -0.233 | 0.248 | 0.040 | 0.037 | 0.044 | -0.116 | -0.002 | -0.014 |
| C-GLU | -0.233 | -0.154 | 0.196 | 0.023 | 0.014 | 0.015 | -0.153 | -0.130 | 0.074 | -0.046 | -0.212 | 0.029 | -0.065 | -0.097 | 0.042 | -0.049 |
| C-LDH | -0.261 | -0.354 | -0.258 | -0.170 | 0.033 | 0.106 | -0.032 | 0.015 | -0.348 | 0.373 | 0.248 | 0.152 | -0.310 | -0.063 | 0.363 | -0.200 |
| C-TP | -0.106 | 0.113 | 0.087 | 0.247 | 0.156 | 0.153 | 0.063 | -0.158 | -0.181 | 0.193 | 0.213 | 0.040 | -0.185 | 0.138 | 0.195 | 0.019 |
| C-IgG | -0.092 | 0.188 | 0.207 | -0.104 | 0.044 | 0.081 | 0.194 | -0.069 | -0.228 | 0.302 | 0.270 | -0.017 | -0.343 | 0.138 | 0.318 | -0.141 |

Continued Table S1 The *r* of correlation analysis between parameters

|  | Bas | Hb | PLT | CRP | TP | ALB | G | ALT | TBIL | DBIL | GFR | K | Na | Cl | LDH |
| --- | --- | --- | --- | --- | --- | --- | --- | --- | --- | --- | --- | --- | --- | --- | --- |
| C-TRUST | -0.116 | -0.026 | -0.068 | -0.038 | 0.036 | -0.091 | 0.144 | 0.075 | 0.121 | 0.169 | -0.240 | 0.031 | 0.251 | 0.085 | -0.043 |
| C-CL | 0.089 | 0.091 | 0.058 | 0.342 | -0.097 | -0.252 | 0.161 | -0.010 | -0.052 | -0.044 | -0.143 | 0.010 | 0.201 | 0.332 | 0.043 |
| C-GLU | 0.154 | 0.238 | -0.285 | 0.223 | 0.031 | 0.099 | -0.057 | 0.270 | 0.004 | -0.010 | 0.028 | -0.090 | -0.053 | -0.204 | -0.107 |
| C-LDH | -0.075 | 0.047 | -0.103 | 0.514 | -0.288 | -0.287 | -0.062 | 0.151 | 0.117 | 0.098 | -0.177 | -0.030 | 0.073 | 0.053 | 0.168 |
| C-TP | 0.035 | 0.015 | -0.110 | 0.111 | 0.083 | 0.009 | 0.147 | 0.104 | 0.049 | 0.032 | 0.026 | -0.092 | 0.013 | -0.186 | 0.051 |
| C-IgG | -0.147 | -0.019 | -0.124 | 0.177 | 0.103 | -0.097 | 0.314 | 0.095 | 0.179 | 0.169 | -0.227 | 0.109 | 0.189 | 0.060 | 0.141 |

Table S2 The *P* value of correlation analysis between parameters

|  | Urine epithelium | IgG | IgA | IgM | C3 | C4 | PT | APTT | TT | Fib | D-D | WBC | Lym | Mon | Neu | Eos |
| --- | --- | --- | --- | --- | --- | --- | --- | --- | --- | --- | --- | --- | --- | --- | --- | --- |
| C-TRUST | 0.186 | 0.683 | 0.839 | 0.911 | 0.502 | 0.241 | 0.129 | 0.297 | 0.100 | 0.196 | 0.028 | 0.377 | 0.979 | 0.470 | 0.607 | 0.875 |
| C-CL | 0.001 | 0.216 | 0.241 | 0.231 | 0.326 | 0.733 | 0.240 | 0.662 | 0.057 | 0.043 | 0.756 | 0.738 | 0.688 | 0.291 | 0.984 | 0.901 |
| C-GLU | 0.063 | 0.267 | 0.160 | 0.870 | 0.920 | 0.916 | 0.215 | 0.296 | 0.552 | 0.713 | 0.093 | 0.795 | 0.554 | 0.378 | 0.703 | 0.661 |
| C-LDH | 0.037 | 0.009 | 0.065 | 0.228 | 0.815 | 0.454 | 0.796 | 0.906 | 0.004 | 0.002 | 0.050 | 0.170 | 0.004 | 0.570 | 0.001 | 0.070 |
| C-TP | 0.402 | 0.415 | 0.534 | 0.074 | 0.266 | 0.273 | 0.615 | 0.203 | 0.143 | 0.117 | 0.091 | 0.719 | 0.092 | 0.211 | 0.075 | 0.863 |
| C-IgG | 0.512 | 0.191 | 0.153 | 0.476 | 0.764 | 0.581 | 0.163 | 0.626 | 0.101 | 0.028 | 0.058 | 0.890 | 0.005 | 0.270 | 0.009 | 0.260 |

Continued Table S2 The *P* value of correlation analysis between parameters

|  | Bas | Hb | PLT | CRP | TP | ALB | G | ALT | TBIL | DBIL | GFR | K | Na | Cl | LDH |
| --- | --- | --- | --- | --- | --- | --- | --- | --- | --- | --- | --- | --- | --- | --- | --- |
| C-TRUST | 0.293 | 0.817 | 0.541 | 0.799 | 0.756 | 0.429 | 0.207 | 0.518 | 0.296 | 0.141 | 0.270 | 0.789 | 0.026 | 0.458 | 0.716 |
| C-CL | 0.422 | 0.411 | 0.601 | 0.018 | 0.400 | 0.027 | 0.157 | 0.932 | 0.656 | 0.702 | 0.515 | 0.932 | 0.076 | 0.003 | 0.719 |
| C-GLU | 0.162 | 0.030 | 0.009 | 0.132 | 0.786 | 0.393 | 0.617 | 0.018 | 0.974 | 0.933 | 0.900 | 0.432 | 0.640 | 0.073 | 0.363 |
| C-LDH | 0.502 | 0.676 | 0.353 | 0.000 | 0.012 | 0.012 | 0.589 | 0.192 | 0.313 | 0.398 | 0.418 | 0.796 | 0.526 | 0.649 | 0.155 |
| C-TP | 0.753 | 0.890 | 0.320 | 0.458 | 0.471 | 0.939 | 0.196 | 0.368 | 0.674 | 0.781 | 0.906 | 0.422 | 0.913 | 0.103 | 0.663 |
| C-IgG | 0.238 | 0.878 | 0.320 | 0.293 | 0.423 | 0.448 | 0.011 | 0.460 | 0.160 | 0.186 | 0.351 | 0.393 | 0.135 | 0.637 | 0.282 |

*P* value <0.05 was considered significant.

**Abbreviations:** CSF, cerebrospinal fluid; C-TRUST, cerebrospinal fluid toluidine red unheated serum test; C-CL, cerebrospinal fluid chloride ion; C-GLU, cerebrospinal fluid glucose; C-LDH, cerebrospinal fluid lactate dehydrogenase; C-TP, cerebrospinal fluid total protein; C-IgG, cerebrospinal fluid immunoglobulin G; IgA, immunoglobulin A; TRUST, toluidine red unheated serum test; TP, total protein; mAlb, microalbumin; IgG, immunoglobulin G; IgM, immunoglobulin M; CRP, C-reactive protein; PT, Prothrombin time; APTT, activated partial thromboplastin time; TT, thrombin time; Fib, fibrinogen; DD, D-dimer; INR, international normalized ratio; WBC, white blood cell; Lym, lymphocyte; Mon, monocyte; Neu, neutrophil; PLT, platelet; Eos, eosinophil; Bas, basophil; NLR, neutrophil-to-lymphocyte ratio; PLR, platelet-to-lymphocyte; HCT, hematocrit; ALT, alanine aminotransferase; AST, aspartate aminotransferase;mAlb, microalbumin;Hb, hemoglobin; TP, total protein; G, globulin; ALB, albumin; ALP, alkalinephosphatase; TB, total bilirubin; CB, conjugated; Cr, creatinine; UA, uric acid; TG, triglyceride; TC, total cholesterol; LDLC, low-density lipoprotein cholesterol; HDLC, high-density lipoprotein cholesterol; Glu, glucose; K, potassium ion; Na, sodium ion; Cl, chloride ion; GFR, glomerular filtration rate; LDH, lactate dehydrogenase.
